# Supplementary material for: Structures and properties of lanthanide metal–organic frameworks based on a 1,2,3-triazole-containing tetracarboxylate ligand
Source: Royal Society of Chemistry journal article supplement (doi:10.1039/c2dt31717f), 2012-01-01
Supplement: c2dt31717f.pdf [file c2dt31717f.pdf]

## Structures and properties of lanthanide metal-organic frameworks based on 1,2,3-triazole-containing tetracarboxylate ligand

Libo Sun, Yi Li, Zhiqiang Liang,\* Jihong Yu and Ruren Xu

State Key Laboratory of Inorganic Synthesis and Preparative Chemistry,

College of chemistry, Jilin University, Changchun 130012, China

E-mail: [liangzq@jlu.edu.cn](mailto:liangzq@jlu.edu.cn)

Fax: +86-431-85168609

**Fig. S1** Representation of the asymmetric unit of compound **1** showing ellipsoid at the 30% probability level. The hydrogen atoms and lattice water molecules are omitted for clarity.

**Fig. S2** (a) The coordination modes of ligand (yellow: **C-IP**; grey: **N-IP**). (b) Six-connected binuclear unit and coordinated ligand. (c) The 3,6-connected **rtl** network of compound **1**.

**Fig. S3** View of the hydrogen bonds of O(5)  $\cdots$  H(20)-O(12) in compound **1**.

**Fig. S4** Powder X-ray diffraction patterns of compound **1-4**.

**Fig. S5** FT-IR spectra of compound **1-4** and H<sub>4</sub>L.

**Fig. S6** TGA curves for compound **1-4**.

**Fig. S7** UV-vis absorption spectra of compound **1-4**.

**Fig. S8** The solid state photoluminescence spectra of H<sub>4</sub>L.

**Fig. S9** The  $\chi_M^{-1}$  vs  $T$  plots of compound **3** and **4**.

**Fig. S10** Powder X-ray diffraction patterns of compound **3** dispersed in Cu(NO<sub>3</sub>)<sub>2</sub> aqueous solution (0.01 mol/L).

**Table S1** Selected bond distances (Å) and angles (°) for compound **1**.

**Table S2** Selected bond distances (Å) and angles (°) for compound **2**.

**Table S3** Selected bond distances (Å) and angles (°) for compound **3**.

**Table S4** Selected bond distances (Å) and angles (°) for compound **4**.

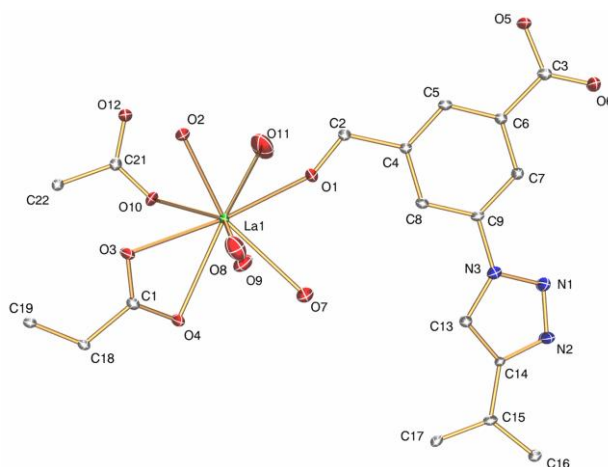

**Fig. S1** Representation of the asymmetric unit of compound **1** showing ellipsoid at the 30% probability level. The hydrogen atoms and lattice water molecules are omitted for clarity.

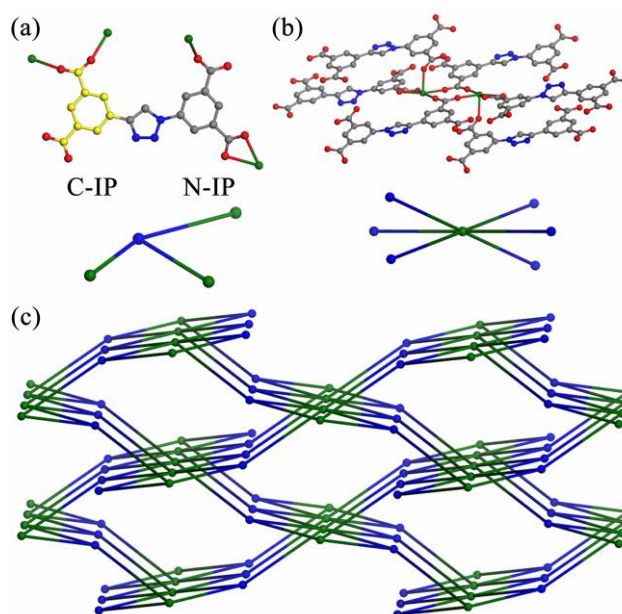

**Fig. S2** (a) The coordination modes of ligand (yellow: **C-IP**; grey: **N-IP**). (b) Six-connected binuclear unit and coordinated ligand. (c) The 3,6-connected **rtl** network of compound **1**.

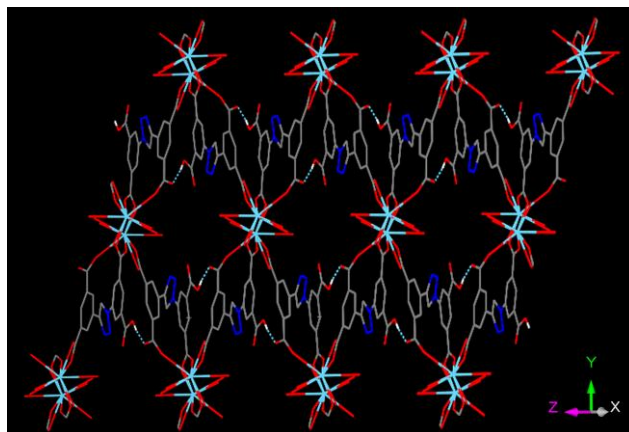

**Fig. S3** View of the hydrogen bonds of O(5)  $\cdots$  H(20)-O(12) in compound **1**.

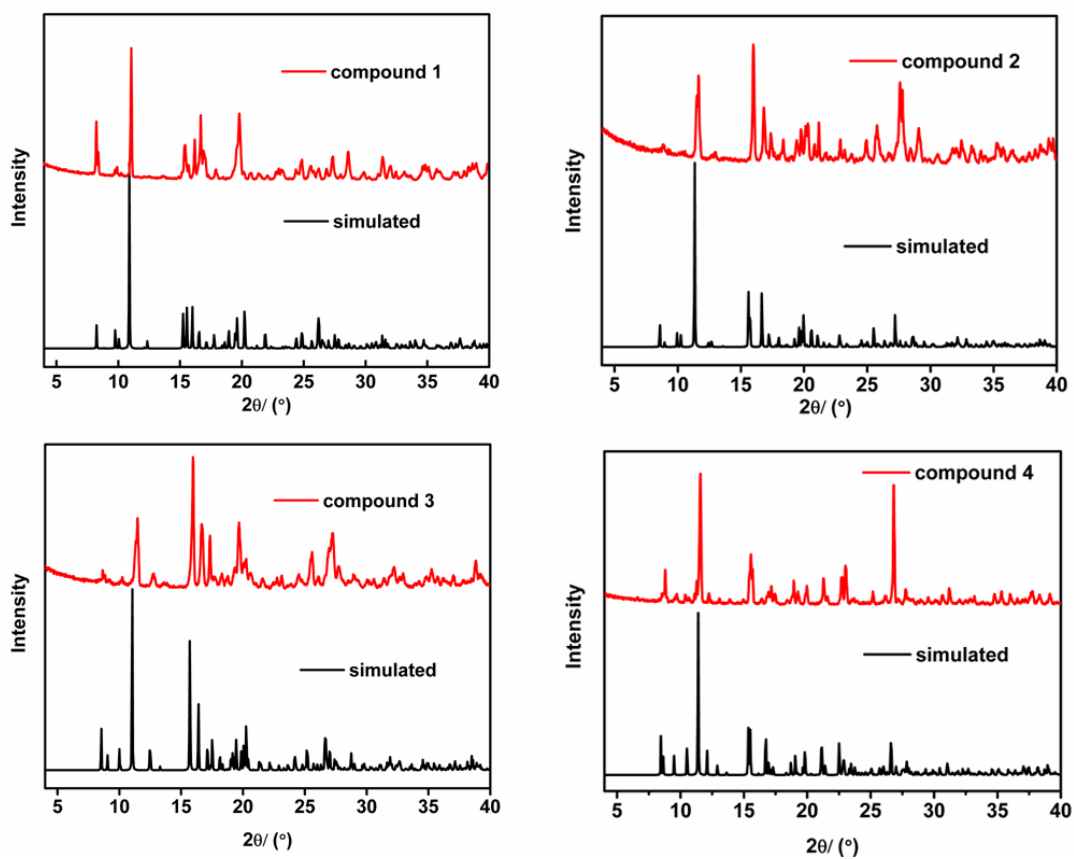

**Fig. S4** Powder X-ray diffraction patterns of compound **1-4**.

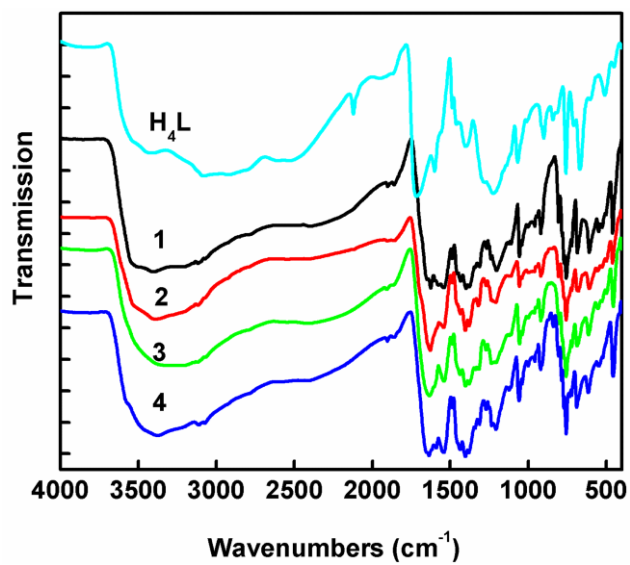

**Fig. S5** FT-IR spectra of compound 1-4 and  $\text{H}_4\text{L}$ .

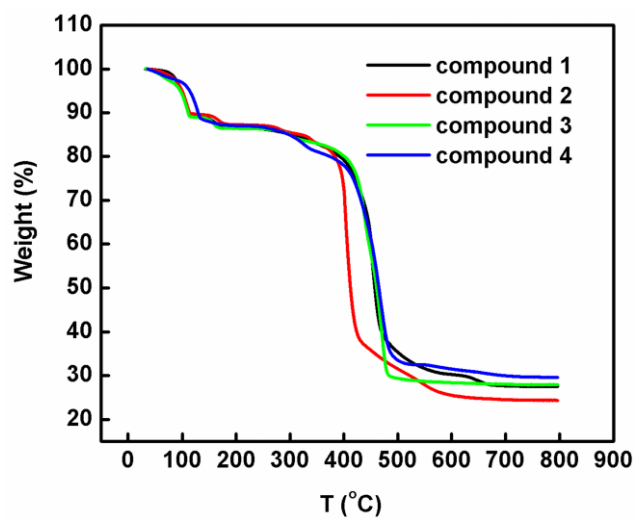

**Fig. S6** TGA curves for compound 1-4.

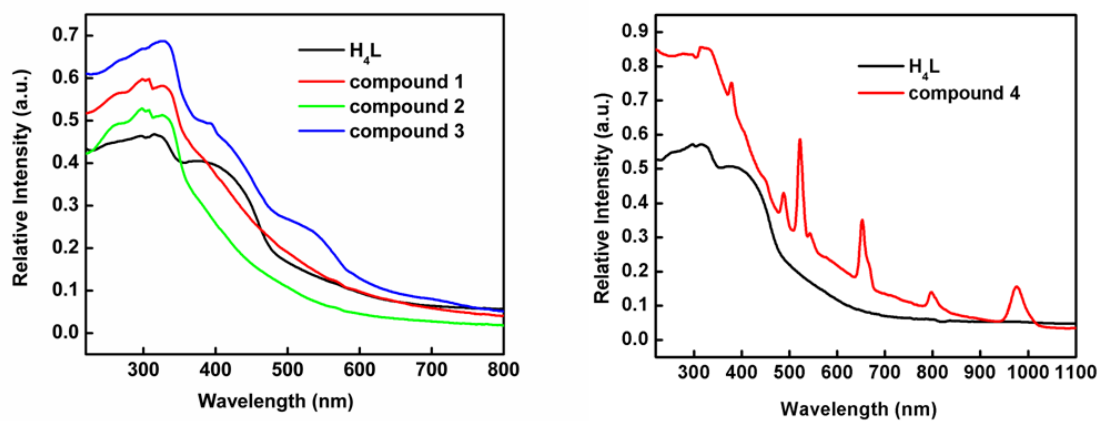

**Fig. S7** UV-vis absorption spectra of compound 1-4.

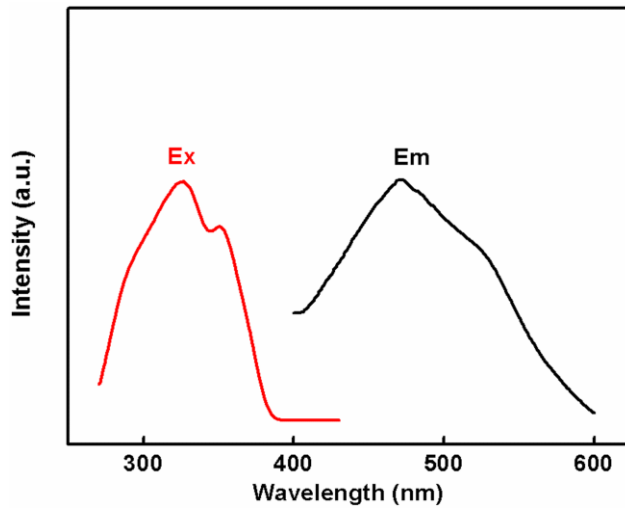

**Fig. S8** The solid state photoluminescence spectra of H<sub>4</sub>L.

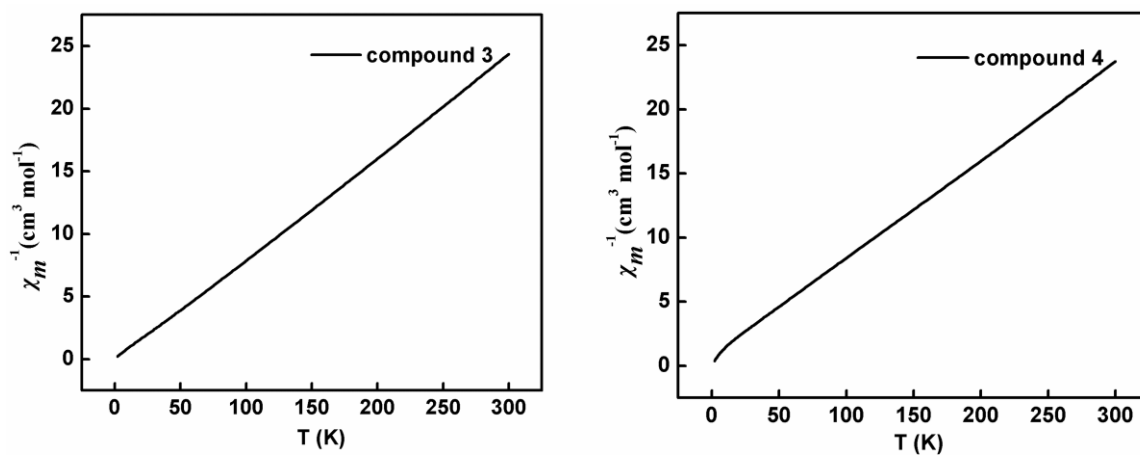

**Fig. S9** The  $\chi_M^{-1}$  vs  $T$  plots of compounds **3** and **4**.

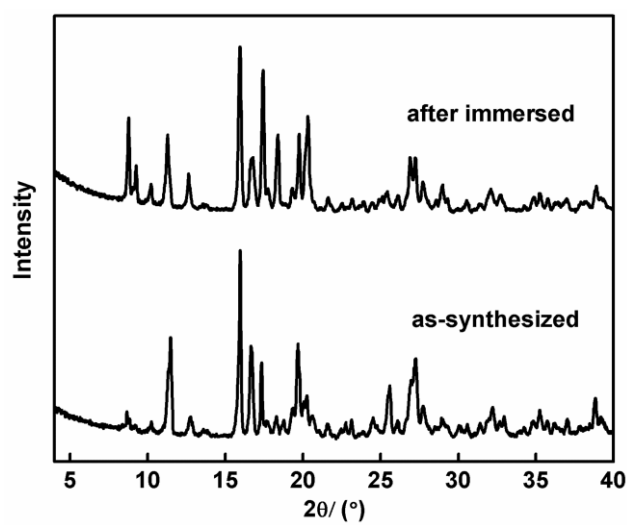

**Fig. S10** Powder X-ray diffraction patterns of compound **3** dispersed in  $\text{Cu}(\text{NO}_3)_2$  aqueous solution (0.01 mol/L).

**Table S1** Selected bond distances (Å) and angles (°) for compound **1**

**Bond distances/ Å**

---

|             |          |
|-------------|----------|
| La(1)-O(2)  | 2.424(2) |
| La(1)-O(1)  | 2.478(3) |
| La(1)-O(10) | 2.501(3) |
| La(1)-O(8)  | 2.542(3) |
| La(1)-O(3)  | 2.601(2) |
| La(1)-O(9)  | 2.601(3) |
| La(1)-O(11) | 2.616(3) |
| La(1)-O(7)  | 2.666(3) |
| La(1)-O(4)  | 2.676(2) |

---

**Bond angles/ °**

---

|                   |            |
|-------------------|------------|
| O(2)-La(1)-O(1)   | 81.29(9)   |
| O(2)-La(1)-O(10)  | 80.15(9)   |
| O(1)-La(1)-O(10)  | 138.81(9)  |
| O(2)-La(1)-O(8)   | 82.72(11)  |
| O(1)-La(1)-O(8)   | 71.42(10)  |
| O(10)-La(1)-O(8)  | 140.91(9)  |
| O(2)-La(1)-O(3)   | 76.11(8)   |
| O(1)-La(1)-O(3)   | 136.79(10) |
| O(10)-La(1)-O(3)  | 72.32(9)   |
| O(8)-La(1)-O(3)   | 69.55(9)   |
| O(2)-La(1)-O(9)   | 141.55(10) |
| O(1)-La(1)-O(9)   | 109.94(10) |
| O(10)-La(1)-O(9)  | 67.26(9)   |
| O(8)-La(1)-O(9)   | 135.64(10) |
| O(3)-La(1)-O(9)   | 110.69(9)  |
| O(2)-La(1)-O(11)  | 80.69(13)  |
| O(1)-La(1)-O(11)  | 68.70(12)  |
| O(10)-La(1)-O(11) | 72.20(11)  |
| O(8)-La(1)-O(11)  | 138.57(12) |
| O(3)-La(1)-O(11)  | 140.24(10) |
| O(9)-La(1)-O(11)  | 70.58(13)  |
| O(2)-La(1)-O(7)   | 147.57(9)  |
| O(1)-La(1)-O(7)   | 70.52(8)   |
| O(10)-La(1)-O(7)  | 131.95(8)  |

|                  |            |
|------------------|------------|
| O(8)-La(1)-O(7)  | 73.49(10)  |
| O(3)-La(1)-O(7)  | 114.12(8)  |
| O(9)-La(1)-O(7)  | 66.26(9)   |
| O(11)-La(1)-O(7) | 102.79(11) |
| O(2)-La(1)-O(4)  | 125.54(8)  |
| O(1)-La(1)-O(4)  | 136.07(8)  |
| O(10)-La(1)-O(4) | 83.90(8)   |
| O(8)-La(1)-O(4)  | 78.01(9)   |
| O(3)-La(1)-O(4)  | 49.44(7)   |
| O(9)-La(1)-O(4)  | 72.08(9)   |
| O(11)-La(1)-O(4) | 141.15(12) |
| O(7)-La(1)-O(4)  | 71.02(8)   |

---

**Hydrogen bonds /Å and °**

---

| <b>D-H...A</b>              | <b>d(D-H)</b> | <b>d(H...A)</b> | <b>d(D...A)</b> | <b>&lt;(DHA)</b> |
|-----------------------------|---------------|-----------------|-----------------|------------------|
| <b>O(5)-H(20)...O(12)#7</b> | <b>0.87</b>   | <b>1.70</b>     | <b>2.556(3)</b> | <b>166.8</b>     |

---

**Symmetry transformations used to generate equivalent atoms:**

**#7 -x,y+1/2,-z-1/2**



**Table S2** Selected bond distances (Å) and angles (°) for compound **2**

**Bond distances/ Å**

---

|               |          |
|---------------|----------|
| Eu(1)-O(11)#1 | 2.312(7) |
| Eu(1)-O(12)   | 2.365(7) |
| Eu(1)-O(1)    | 2.403(7) |
| Eu(1)-O(4)    | 2.440(7) |
| Eu(1)-O(13)   | 2.478(9) |
| Eu(1)-O(6)    | 2.520(7) |
| Eu(1)-O(7)    | 2.561(8) |
| Eu(1)-O(5)    | 2.600(8) |
| Eu(1)-O(2)    | 2.630(9) |

---

**Bond angles/ °**

---

|                     |          |
|---------------------|----------|
| O(11)#1-Eu(1)-O(12) | 137.8(3) |
| O(11)#1-Eu(1)-O(1)  | 86.5(3)  |
| O(12)-Eu(1)-O(1)    | 82.1(3)  |
| O(11)#1-Eu(1)-O(4)  | 138.4(2) |
| O(12)-Eu(1)-O(4)    | 75.8(3)  |
| O(1)-Eu(1)-O(4)     | 73.2(3)  |
| O(11)#1-Eu(1)-O(13) | 91.1(3)  |
| O(12)-Eu(1)-O(13)   | 70.0(3)  |
| O(1)-Eu(1)-O(13)    | 134.8(3) |
| O(4)-Eu(1)-O(13)    | 129.0(3) |
| O(11)#1-Eu(1)-O(6)  | 70.9(3)  |
| O(12)-Eu(1)-O(6)    | 144.8(3) |
| O(1)-Eu(1)-O(6)     | 80.2(3)  |
| O(4)-Eu(1)-O(6)     | 70.1(2)  |
| O(13)-Eu(1)-O(6)    | 140.8(3) |
| O(11)#1-Eu(1)-O(7)  | 141.9(3) |
| O(12)-Eu(1)-O(7)    | 74.7(3)  |
| O(1)-Eu(1)-O(7)     | 123.6(2) |
| O(4)-Eu(1)-O(7)     | 51.6(2)  |
| O(13)-Eu(1)-O(7)    | 83.1(3)  |
| O(6)-Eu(1)-O(7)     | 90.3(3)  |
| O(11)#1-Eu(1)-O(5)  | 74.6(3)  |
| O(12)-Eu(1)-O(5)    | 127.8(3) |
| O(1)-Eu(1)-O(5)     | 149.5(3) |

|                    |          |
|--------------------|----------|
| O(4)-Eu(1)-O(5)    | 105.6(3) |
| O(13)-Eu(1)-O(5)   | 70.5(3)  |
| O(6)-Eu(1)-O(5)    | 71.2(3)  |
| O(7)-Eu(1)-O(5)    | 68.0(3)  |
| O(11)#1-Eu(1)-O(2) | 69.1(3)  |
| O(12)-Eu(1)-O(2)   | 68.8(3)  |
| O(1)-Eu(1)-O(2)    | 70.2(3)  |
| O(4)-Eu(1)-O(2)    | 131.6(3) |
| O(13)-Eu(1)-O(2)   | 66.8(3)  |
| O(6)-Eu(1)-O(2)    | 130.9(3) |
| O(7)-Eu(1)-O(2)    | 138.7(3) |
| O(5)-Eu(1)-O(2)    | 122.1(3) |

---

**Symmetry transformations used to generate equivalent atoms:**

**#1 -x,-y,-z+1**

**Hydrogen bonds /Å and °**

---

| <b>D-H...A</b>              | <b>d(D-H)</b> | <b>d(H...A)</b> | <b>d(D...A)</b>  | <b>&lt;(DHA)</b> |
|-----------------------------|---------------|-----------------|------------------|------------------|
| <b>O(8)-H(20)...O(10)#3</b> | <b>0.85</b>   | <b>1.73</b>     | <b>2.544(10)</b> | <b>158.8</b>     |

---

**Symmetry transformations used to generate equivalent atoms:**

**#3 x-1,-y+1/2,z-3/2**

**Table S3** Selected bond distances (Å) and angles (°) for compound **3**

**Bond distances/ Å**

---

|             |           |
|-------------|-----------|
| Tb(1)-O(2)  | 2.283(6)  |
| Tb(1)-O(1)  | 2.312(6)  |
| Tb(1)-O(7)  | 2.324(6)  |
| Tb(1)-O(9)  | 2.396(7)  |
| Tb(1)-O(6)  | 2.411(6)  |
| Tb(1)-O(11) | 2.417(11) |
| Tb(1)-O(10) | 2.485(8)  |
| Tb(1)-O(5)  | 2.501(6)  |

---

**Bond angles/ °**

---

|                   |          |
|-------------------|----------|
| O(2)-Tb(1)-O(1)   | 82.0(2)  |
| O(2)-Tb(1)-O(7)   | 105.6(3) |
| O(1)-Tb(1)-O(7)   | 77.9(2)  |
| O(2)-Tb(1)-O(9)   | 80.6(3)  |
| O(1)-Tb(1)-O(9)   | 138.5(3) |
| O(7)-Tb(1)-O(9)   | 71.0(2)  |
| O(2)-Tb(1)-O(6)   | 158.4(3) |
| O(1)-Tb(1)-O(6)   | 78.8(2)  |
| O(7)-Tb(1)-O(6)   | 80.0(2)  |
| O(9)-Tb(1)-O(6)   | 120.6(2) |
| O(2)-Tb(1)-O(11)  | 87.2(4)  |
| O(1)-Tb(1)-O(11)  | 73.4(4)  |
| O(7)-Tb(1)-O(11)  | 146.6(3) |
| O(9)-Tb(1)-O(11)  | 142.3(3) |
| O(6)-Tb(1)-O(11)  | 77.9(4)  |
| O(2)-Tb(1)-O(10)  | 78.4(3)  |
| O(1)-Tb(1)-O(10)  | 139.6(3) |
| O(7)-Tb(1)-O(10)  | 141.5(3) |
| O(9)-Tb(1)-O(10)  | 72.0(3)  |
| O(6)-Tb(1)-O(10)  | 110.6(3) |
| O(11)-Tb(1)-O(10) | 70.7(3)  |
| O(2)-Tb(1)-O(5)   | 146.8(2) |
| O(1)-Tb(1)-O(5)   | 131.1(2) |
| O(7)-Tb(1)-O(5)   | 86.5(2)  |
| O(9)-Tb(1)-O(5)   | 74.3(2)  |

|                  |         |
|------------------|---------|
| O(6)-Tb(1)-O(5)  | 52.8(2) |
| O(11)-Tb(1)-O(5) | 99.5(4) |
| O(10)-Tb(1)-O(5) | 73.5(2) |

---

**Hydrogen bonds /Å and °**

---

| <b>D-H...A</b>             | <b>d(D-H)</b> | <b>d(H...A)</b> | <b>d(D...A)</b> | <b>&lt;(DHA)</b> |
|----------------------------|---------------|-----------------|-----------------|------------------|
| <b>O(3)-H(20)...O(8)#7</b> | <b>0.96</b>   | <b>1.59</b>     | <b>2.549(8)</b> | <b>177.1</b>     |

---

**Symmetry transformations used to generate equivalent atoms:**

**#7  $x, -y+1/2, z-1/2$**

**Table S4** Selected bond distances (Å) and angles (°) for compound **4**

**Bond distances/ Å**

---

|            |          |
|------------|----------|
| Er(1)-O(2) | 2.255(4) |
| Er(1)-O(6) | 2.299(4) |
| Er(1)-O(8) | 2.299(4) |
| Er(1)-O(4) | 2.355(4) |
| Er(1)-O(3) | 2.375(5) |
| Er(1)-O(5) | 2.401(4) |
| Er(1)-O(1) | 2.402(4) |
| Er(1)-O(7) | 2.423(4) |

---

**Bond angles/ °**

---

|                 |            |
|-----------------|------------|
| O(2)-Er(1)-O(6) | 103.47(14) |
| O(2)-Er(1)-O(8) | 89.52(15)  |
| O(6)-Er(1)-O(8) | 141.71(15) |
| O(2)-Er(1)-O(4) | 154.49(16) |
| O(6)-Er(1)-O(4) | 74.21(15)  |
| O(8)-Er(1)-O(4) | 78.82(16)  |
| O(2)-Er(1)-O(3) | 85.30(17)  |
| O(6)-Er(1)-O(3) | 68.85(15)  |
| O(8)-Er(1)-O(3) | 149.05(15) |
| O(4)-Er(1)-O(3) | 116.09(17) |
| O(2)-Er(1)-O(5) | 74.11(13)  |
| O(6)-Er(1)-O(5) | 141.66(16) |
| O(8)-Er(1)-O(5) | 76.40(15)  |
| O(4)-Er(1)-O(5) | 123.74(14) |
| O(3)-Er(1)-O(5) | 72.83(15)  |
| O(2)-Er(1)-O(1) | 78.46(15)  |
| O(6)-Er(1)-O(1) | 75.19(14)  |
| O(8)-Er(1)-O(1) | 72.38(14)  |
| O(4)-Er(1)-O(1) | 76.41(15)  |
| O(3)-Er(1)-O(1) | 135.57(16) |
| O(5)-Er(1)-O(1) | 138.18(14) |
| O(2)-Er(1)-O(7) | 128.20(13) |
| O(6)-Er(1)-O(7) | 116.51(13) |
| O(8)-Er(1)-O(7) | 79.18(14)  |
| O(4)-Er(1)-O(7) | 72.12(14)  |

|                 |            |
|-----------------|------------|
| O(3)-Er(1)-O(7) | 80.24(16)  |
| O(5)-Er(1)-O(7) | 54.09(13)  |
| O(1)-Er(1)-O(7) | 140.89(15) |

---

**Hydrogen bonds /Å and °**

---

| <b>D-H...A</b>              | <b>d(D-H)</b> | <b>d(H...A)</b> | <b>d(D...A)</b> | <b>&lt;(DHA)</b> |
|-----------------------------|---------------|-----------------|-----------------|------------------|
| <b>O(10)-H(20)...O(9)#5</b> | <b>0.86</b>   | <b>1.73</b>     | <b>2.562(6)</b> | <b>162.1</b>     |

---

**Symmetry transformations used to generate equivalent atoms:**

**#5 -x+1,y-1/2,-z+1/2**
